# Supplementary material for: Development of Large-Scale Functional Brain Networks in Children
Source: PLoS Biol. 2009 Jul 21;7(7):e1000157. doi: 10.1371/journal.pbio.1000157 (PMC2705656; doi:10.1371/journal.pbio.1000157)
Supplement: Text S1 — Experimental procedures. (0.07 MB DOC) [file pbio.1000157.s003.doc]

**Supplementary Text S1**

**Experimental Procedures**

**Classification analysis of whole-brain functional connectivity patterns in children and young-adults**

To investigate the developmental differences in whole-brain functional connectivity patterns, we examined the patterns in the two groups. The functional connectivity patterns -- the correlation values of 4005 pairs of anatomical regions – were used as the input (features) to a pattern-based classifier. The classifier distinguishes young-adults from children by making classification decision based on value of the linear combination of these features. A widely used linear-classifier (Support Vector Machine Classifier) that was best suited for our purpose of classification based on large number of features (4005) but a small number of training samples (45), was used in our analysis. Leave-one-out cross-validation (LOOCV) was used to measure the performance of the classifier in distinguishing young-adults from children. In LOOCV, one single observation is used for testing the classifier that is trained using the remaining observations. This process is repeated such that every observation is used once for testing purposes. This analysis was performed using the WEKA software, which is a java based package for pattern recognition (<http://www.cs.waikato.ac.nz/ml/weka/>).

**Classification analysis of inter-regional functional connectivity patterns in children and young-adults**

The inter-regional connectivity patterns – the correlation values between five major divisions of the brain – were used as features for a Support vector classifier. LOOCV accuracy values for each of the 10 pairs of divisions were computed, as described above.

**Anatomical distance between brain regions.**

The anatomical distance between brain regions was computed by measuring the average length of the fiber tracks connecting those regions. Fiber tracks were derived using diffusion tensor imaging (DTI) data obtained from 18 of the 23 children subjects and 15 of 22 young-adults.

The DTI pulse sequence was a diffusion-weightedsingle-shot spin-echo, echo planar imaging sequence (TE = 70.8ms; TR = 8.6 s; field of view = 220 mm; matrix size = 128 x 128;bandwidth = ±110kHz; partial k-space acquisition). Weacquired 63 axial, 2-mm thick slices (no skip) for 2 *b* values,b = 0 and b = approximately 850 s/mm2. The high b value wasobtained by applying gradients along 46 different diffusiondirections (23 noncollinear directions). Two gradient axeswere energized simultaneously to minimize TE. The polarity ofthe effective diffusion-weighting gradients was reversed forodd repetitions to reduce cross-terms between diffusion gradientsand imaging and background gradients. Although Jones [2]suggests that measuring more diffusion directions would be amore efficient way to reliably estimate diffusion tensors ofarbitrary orientation, our signal-to-noise ratio is sufficientlyhigh from our 4 repeats to produce very reliable tensor estimatessuitable for tractography.

DTI data were preprocessed using a custom program based on normalizedmutual information that removed eddy current distortion effectsand determined a constrained nonrigid image registration ofall the diffusion images [3]. The 6 elementsof the diffusion tensor were determined by multivariate regression[4,5]. For each subject,the non–diffusion-weighted (*b* = 0) images were coregisteredto the T1-weighted 3-D SPGR anatomical images using a mutualinformation 3-D rigid-body coregistration algorithm from SPM2. Several anatomical landmarks,including the anterior commissure (AC), the posterior commissure(PC), and the midsagittal plane, were identified by hand inthe T1 images. With these landmarks, we computed a rigid-bodytransform from the native image space to the conventional AC-PC–alignedspace. The DTI data were then resampled to this AC-PC–alignedspace with 2-mm isotropic voxels using a spline-based tensorinterpolation algorithm [6], taking care torotate the tensors to preserve their orientation with respectto the anatomy [7]. The T1 images were resampledto AC-PC–aligned space with 1-mm isotropic voxels. Weconfirmed by visual inspection of each dataset that this coregistrationtechnique aligns the DTI and T1 images to within 1–2 millimetersin the brain regions of interest.

The 90 anatomical regions of interest, which were in the MNI space, were warped back to each individual brain so that they could be used for subsequent DTI tractography analyses. This was done by applyingthe inverse of the spatial normalization transformation. Asfiber tracking becomes unreliable in gray matter, we ensuredthat our ROIs extended 2–3mm into the white matter.

DTI fiber tractography was used to estimate the likely connectionsbetween the 90 anatomical regions of interest. Using custom DTI analysis software (availablefor download at <http://sirl.stanford.edu/software/>), the tractographyprocedure was initiated by whole-brain fiber tracking that producedmany fiber paths. Tracts that did not end in both ROIs were discarded. Each fiber tract was estimated usinga deterministic streamlines tracking algorithm [8,9,10] with a fourth orderRunge-Kutta path integration method and1 mm fixed step size. A continuous tensor field was estimatedusing trilinear interpolation of the tensor elements. Startingfrom the initial seed point, fiber paths were traced in bothdirections along the principal diffusion axis. Path tracingproceeded until the FA fell below 0.15 or until the minimumangle between the current and previous path segments was largerthan 30°.

To combine resulting fiber maps, individual tracts were translatedinto a common space by applying the spatial normalization parametersthat map each individual brain to the same MNI template towhich the fMRI data were aligned. The deformation fieldresulting from the spatial normalization calculation was appliedto the fiber coordinates from each individual brain to bringthem all into a common space. The anatomical distance between two brain regions was obtained by computing the average of length of fiber tracts, in the common MNI space, connecting those regions, averaged across all the subjects. The fiber length was computed in MNI space, instead of native space, to rule out the effect of age-related changes in inter-regional fiber length on our findings.

**Analysis of functional connectivity matrices**

Group averaged 90-by-90 correlation matrices for young-adults and children are shown in Figure 5. Value of the *(i,j)*th element of the correlation matrix corresponds to group averaged scale 3 wavelet correlation between the resting-state timeseries of brain region *i* and region *j*. Low correlation values are shown in darker color while high correlation values are shown in lighter color.

Inter-subject variability in these correlation values was low in both the groups. Specifically, correlation values in the young-adult group showed inter-subject variance of 0.046 while the correlation values in the child group showed inter-subject variance of 0.036. Between group comparison revealed higher inter-subject variance in the young-adults compared to children (p < 0.01).

A detailed description of quantitative between group differences observed in these correlation matrices is presented in the results section as well as in Figure 4

**References**

1. Mesulam MM (2000) Principles of behavioral and cognitive neurology. 2nd ed. Oxford: Oxford University Press. pp. xviii, 540 p.

2. Jones DK (2004) The effect of gradient sampling schemes on measures derived from diffusion tensor MRI: a Monte Carlo study. Magn Reson Med 51: 807-815.

3. Bammer R, Auer M, Keeling SL, Augustin M, Stables LA, et al. (2002) Diffusion tensor imaging using single-shot SENSE-EPI. Magn Reson Med 48: 128-136.

4. Basser PJ (1995) Inferring microstructural features and the physiological state of tissues from diffusion-weighted images. NMR Biomed 8: 333-344.

5. Basser PJ, Pierpaoli C (1996) Microstructural and physiological features of tissues elucidated by quantitative-diffusion-tensor MRI. J Magn Reson B 111: 209-219.

6. Pajevic S, Aldroubi A, Basser PJ (2002) A continuous tensor field approximation of discrete DT-MRI data for extracting microstructural and architectural features of tissue. J Magn Reson 154: 85-100.

7. Alexander DC, Pierpaoli C, Basser PJ, Gee JC (2001) Spatial transformations of diffusion tensor magnetic resonance images. IEEE Trans Med Imaging 20: 1131-1139.

8. Conturo TE, Lori NF, Cull TS, Akbudak E, Snyder AZ, et al. (1999) Tracking neuronal fiber pathways in the living human brain. Proc Natl Acad Sci U S A 96: 10422-10427.

9. Mori S, Crain BJ, Chacko VP, van Zijl PC (1999) Three-dimensional tracking of axonal projections in the brain by magnetic resonance imaging. Ann Neurol 45: 265-269.

10. Basser PJ, Pajevic S, Pierpaoli C, Duda J, Aldroubi A (2000) In vivo fiber tractography using DT-MRI data. Magn Reson Med 44: 625-632.
